# Supplementary material
Source: PubMed Central journal article supplement (PMC2928251)
Supplement: NIHMS227198-supplement-Supporting_Info.pdf [file NIHMS227198-supplement-Supporting_Info.pdf]

**Supplementary Information:**

**Palmitoylome profiling reveals S-palmitoylation-dependent anti-viral activity of IFITM3**

Jacob S. Yount<sup>1</sup>, Bruno Moltedo<sup>2</sup>, Yu-Ying Yang<sup>1</sup>, Guillaume C. Charron<sup>1</sup>, Thomas M. Moran<sup>2</sup>, Carolina B. López<sup>2</sup>, and Howard C. Hang<sup>1</sup>

<sup>1</sup>The Laboratory of Chemical Biology and Microbial Pathogenesis, The Rockefeller University, 1230 York Ave, New York, NY 10065

<sup>2</sup>Department of Microbiology, The Mount Sinai School of Medicine, One Gustave L. Levy Place, New York, NY 10029

**Supplementary Table 1. Proteins selectively identified with high confidence in alk-16 samples by mass spectrometry.** Data was categorized as high confidence if the sum of assigned spectra was at least 10 fold greater for alk-16 samples than the sum of spectra identified in the DMSO samples. Further, in order to be considered a high confidence candidate, the protein must have been identified with spectral counts greater than 5 in at least 2 of 3 runs. Data was compared to other palmitoylome protein proteomic data sets from the El-Husseini<sup>1</sup>, Freeman<sup>2</sup>, and Cravatt<sup>3</sup> groups and proteins were shaded blue if they had not been identified in these previous experiments (X indicates identification). Ribosomal subunits not previously identified were differentiated with yellow shading as many other ribosomal subunits have been previously characterized as palmitoylated proteins. Proteins with potential myristoylation sites (N-terminal glycines) are marked with an asterisk.

| Gene    | Description                                               | Access. #   | DMSO-1 | ALK16-1 | DMSO-2 | ALK16-2 | DMSO-3 | ALK16-3 | SUM NEG | SUM POS | El-Husseini | Freeman | Cravatt |
|---------|-----------------------------------------------------------|-------------|--------|---------|--------|---------|--------|---------|---------|---------|-------------|---------|---------|
| Canx    | Calnexin                                                  | IPI00119618 | 2      | 36      | 0      | 461     | 0      | 275     | 2       | 772     | X           | X       | X       |
| Ifitm3  | Interferon-Induced Transmembrane Protein 3                | IPI00133243 | 0      | 74      | 0      | 55      | 0      | 76      | 0       | 205     | X           | X       | X       |
| Mtdh    | Protein LYRIC                                             | IPI00330599 | 0      | 3       | 0      | 56      | 0      | 47      | 0       | 106     | X           | X       | X       |
| M6pr    | Cation-dependent mannose-6-phosphate receptor             | IPI00108844 | 0      | 4       | 0      | 49      | 0      | 52      | 0       | 105     | X           | X       | X       |
| Hspd1   | Isoform 1 of 60 kDa heat shock protein, mitochondrial     | IPI00308885 | 3      | 37      | 0      | 12      | 5      | 53      | 8       | 102     | X           | X       | X       |
| Gnai3   | Guanine nucleotide-binding protein G(k) subunit alpha*    | IPI00338854 | 0      | 10      | 0      | 46      | 0      | 34      | 0       | 90      | X           | X       | X       |
| Rpl4    | 60S ribosomal protein L4                                  | IPI00111412 | 0      | 7       | 0      | 18      | 0      | 49      | 0       | 74      | X           | X       | X       |
| Ckap4   | Cytoskeleton-associated protein 4                         | IPI00223047 | 0      | 0       | 0      | 60      | 0      | 11      | 0       | 71      | X           | X       | X       |
| Rpl6    | 60S ribosomal protein L6                                  | IPI00313222 | 5      | 25      | 0      | 14      | 0      | 32      | 5       | 71      | X           | X       | X       |
| Snap23  | Synaptosomal-associated protein                           | IPI00113798 | 0      | 15      | 0      | 21      | 0      | 15      | 0       | 51      | X           | X       | X       |
| -       | RhoA activator C11orf59 homolog*                          | IPI00315187 | 0      | 10      | 4      | 23      | 0      | 18      | 4       | 51      | X           | X       | X       |
| Ncl     | Nucleolin                                                 | IPI00317794 | 0      | 11      | 0      | 0       | 2      | 39      | 2       | 50      | X           | X       | X       |
| Pgd     | 6-phosphogluconate dehydrogenase, decarboxylating         | IPI00466919 | 4      | 11      | 0      | 22      | 0      | 14      | 4       | 47      | X           | X       | X       |
| Gnai2   | Guanine nucleotide-binding protein G(i), alpha-2 subunit* | IPI00228617 | 0      | 0       | 0      | 21      | 0      | 22      | 0       | 43      | X           | X       | X       |
| Atp5a1  | ATP synthase subunit alpha, mitochondrial                 | IPI00130280 | 0      | 8       | 0      | 15      | 2      | 17      | 2       | 40      | X           | X       | X       |
| Got2    | Aspartate aminotransferase, mitochondrial                 | IPI00117312 | 0      | 11      | 0      | 11      | 2      | 16      | 2       | 38      | X           | X       | X       |
| Vcp     | Transitional endoplasmic reticulum ATPase                 | IPI00622335 | 0      | 17      | 0      | 4       | 0      | 16      | 0       | 37      | X           | X       | X       |
| Rps19   | 40S ribosomal protein S19                                 | IPI00113241 | 0      | 7       | 0      | 10      | 0      | 20      | 0       | 37      | X           | X       | X       |
| Rpl5    | 60S ribosomal protein L5*                                 | IPI00308706 | 0      | 7       | 0      | 12      | 0      | 18      | 0       | 37      | X           | X       | X       |
| Cyb5b   | Cytochrome b5 type B                                      | IPI00315794 | 0      | 10      | 0      | 15      | 0      | 11      | 0       | 36      | X           | X       | X       |
| Rps3    | 40S ribosomal protein S3                                  | IPI00134599 | 2      | 15      | 0      | 8       | 0      | 13      | 2       | 36      | X           | X       | X       |
| CD44    | CD44 antigen isoform c                                    | IPI00223769 | 0      | 9       | 0      | 13      | 0      | 13      | 0       | 35      | X           | X       | X       |
| Tfrc    | Transferrin receptor protein 1                            | IPI00124700 | 0      | 0       | 0      | 12      | 0      | 22      | 0       | 34      | X           | X       | X       |
| Rpl7    | 60S ribosomal protein L7                                  | IPI00311236 | 3      | 16      | 0      | 6       | 0      | 12      | 3       | 34      | X           | X       | X       |
| Slc1a5  | Neutral amino acid transporter, member 5                  | IPI00229548 | 0      | 0       | 0      | 26      | 0      | 7       | 0       | 33      | X           | X       | X       |
| Eif4a1  | Eukaryotic initiation factor 4A-1                         | IPI00118676 | 0      | 0       | 0      | 23      | 0      | 10      | 0       | 33      | X           | X       | X       |
| Rpl1    | Ribosomal protein L1                                      | IPI00849927 | 0      | 4       | 0      | 10      | 0      | 19      | 0       | 33      | X           | X       | X       |
| Scamp3  | Putative uncharacterized protein                          | IPI00653426 | 0      | 3       | 0      | 19      | 0      | 10      | 0       | 32      | X           | X       | X       |
| Rap2c   | Ras-related protein Rap-2c                                | IPI00466588 | 0      | 8       | 0      | 12      | 0      | 8       | 0       | 28      | X           | X       | X       |
| Aco2    | Aconitate hydratase, mitochondrial                        | IPI00116074 | 0      | 6       | 0      | 17      | 0      | 3       | 0       | 26      | X           | X       | X       |
| Irgm    | Isoform 1 of Immunity-related GTPase family M protein     | IPI00120264 | 0      | 0       | 0      | 8       | 0      | 18      | 0       | 26      | X           | X       | X       |
| Rpl29   | 60S ribosomal protein L29                                 | IPI00222548 | 0      | 7       | 0      | 8       | 0      | 10      | 0       | 25      | X           | X       | X       |
| Phgdh   | D-3-phosphoglycerate dehydrogenase                        | IPI00225961 | 2      | 0       | 0      | 16      | 0      | 9       | 2       | 25      | X           | X       | X       |
| Slc25a5 | ADP/ATP translocase 2                                     | IPI00127841 | 0      | 0       | 0      | 5       | 0      | 19      | 0       | 24      | X           | X       | X       |
| Slc15a3 | Solute carrier family 15 member 3                         | IPI00124097 | 0      | 3       | 0      | 0       | 0      | 21      | 0       | 24      | X           | X       | X       |
| Rpl19   | 60S ribosomal protein L19                                 | IPI00122426 | 0      | 9       | 0      | 5       | 0      | 10      | 0       | 24      | X           | X       | X       |
| Aldh2   | Aldehyde dehydrogenase, mitochondrial                     | IPI00111218 | 0      | 3       | 0      | 15      | 0      | 5       | 0       | 23      | X           | X       | X       |
| Nras    | GTPase NRas                                               | IPI00775965 | 0      | 0       | 0      | 13      | 0      | 8       | 0       | 21      | X           | X       | X       |
| Rps8    | 40S ribosomal protein S8*                                 | IPI00466820 | 0      | 7       | 0      | 4       | 0      | 10      | 0       | 21      | X           | X       | X       |
| Gm16408 | hypothetical protein, ribosomal protein S2 pseudogene     | IPI00604967 | 0      | 0       | 0      | 11      | 0      | 9       | 0       | 20      | X           | X       | X       |
| Capg    | Capping protein (Actin filament), gelsolin-like           | IPI00277930 | 0      | 5       | 0      | 7       | 0      | 8       | 0       | 20      | X           | X       | X       |
| Ywhaz   | 14-3-3 protein zeta/delta                                 | IPI00116498 | 0      | 0       | 0      | 7       | 0      | 13      | 0       | 20      | X           | X       | X       |
| Gpi     | Glucose-6-phosphate isomerase                             | IPI00228633 | 0      | 0       | 0      | 11      | 2      | 9       | 2       | 20      | X           | X       | X       |
| Rpl7a   | 60S ribosomal protein L7a                                 | IPI00330363 | 0      | 7       | 0      | 3       | 0      | 8       | 0       | 18      | X           | X       | X       |
| Procr   | Endothelial protein C receptor                            | IPI00136972 | 0      | 10      | 0      | 0       | 0      | 8       | 0       | 18      | X           | X       | X       |
| Rpl3    | 60S ribosomal protein L3                                  | IPI00321170 | 0      | 11      | 0      | 3       | 0      | 4       | 0       | 18      | X           | X       | X       |
| Cap1    | Adenylyl cyclase-associated protein 1                     | IPI00137331 | 0      | 5       | 0      | 7       | 0      | 6       | 0       | 18      | X           | X       | X       |
| Nme2    | Nucleoside diphosphate kinase B                           | IPI00127417 | 0      | 6       | 0      | 3       | 0      | 8       | 0       | 17      | X           | X       | X       |
| Gnas    | Guanine nucleotide-binding protein G(s) subunit alpha*    | IPI00119853 | 0      | 6       | 0      | 8       | 0      | 2       | 0       | 16      | X           | X       | X       |
| Pfn1    | Profilin-1                                                | IPI00224740 | 0      | 0       | 0      | 5       | 0      | 10      | 0       | 15      | X           | X       | X       |
| Rpl17   | 60S ribosomal protein L17                                 | IPI00453768 | 0      | 6       | 0      | 0       | 0      | 9       | 0       | 15      | X           | X       | X       |
| Rps17   | 40S ribosomal protein S17*                                | IPI00465880 | 0      | 8       | 0      | 0       | 0      | 7       | 0       | 15      | X           | X       | X       |
| Vdac2   | Voltage-dependent anion-selective channel protein 2       | IPI00122547 | 0      | 0       | 0      | 7       | 0      | 8       | 0       | 15      | X           | X       | X       |
| Eef1b   | Elongation factor 1-beta                                  | IPI00320208 | 0      | 0       | 0      | 5       | 0      | 10      | 0       | 15      | X           | X       | X       |
| Phf8    | PHD finger protein 8                                      | IPI00229377 | 0      | 0       | 0      | 5       | 0      | 9       | 0       | 14      | X           | X       | X       |
| Phb     | Prohibitin                                                | IPI00133440 | 0      | 0       | 0      | 5       | 0      | 9       | 0       | 14      | X           | X       | X       |
| Pdgfra  | Alpha-type platelet-derived growth factor receptor*       | IPI00844650 | 0      | 0       | 0      | 5       | 0      | 7       | 0       | 12      | X           | X       | X       |
| Hnrnpk  | Isoform 1 of Heterogeneous nuclear ribonucleoprotein K    | IPI00223253 | 0      | 0       | 0      | 5       | 0      | 6       | 0       | 11      | X           | X       | X       |
| Acat1   | Acetyl-CoA acetyltransferase, mitochondrial               | IPI00154054 | 0      | 6       | 0      | 5       | 0      | 0       | 0       | 11      | X           | X       | X       |
| Atp5o   | ATP synthase subunit O, mitochondrial                     | IPI00118986 | 0      | 0       | 0      | 5       | 0      | 5       | 0       | 10      | X           | X       | X       |

**Supplementary Tabale 2. Proteins selectively identified with medium confidence in alk-16 samples by mass spectrometry.** Medium confidence proteins must have had a 5 fold or greater number of assigned spectra in the alk-16 samples as compared to DMSO samples and a spectral count of at least 5 in 1 of 3 runs. Data was compared to other lipidated protein proteomic data sets from the El-Husseini<sup>1</sup>, Freeman<sup>2</sup>, and Cravatt<sup>3</sup> groups and proteins were shaded blue if they had not been identified in these previous experiments (X indicates identification). Ribosomal subunits not previously identified were differentiated with yellow shading as many other ribosomal subunits have previously characterized as palmitoylated proteins. Proteins with potential myristoylation sites (N-terminal glycines) are marked with an asterisk. CD14, a previously characterized GPI-anchored protein is marked with two asterisks. Candidate viral proteins were shaded purple.

| Gene    | Description                                             | Access. #   | DMSO-1 | ALK16-1 | DMSO-2 | ALK16-2 | DMSO-3 | ALK16-3 | SUM NEG | SUM POS | El-Husseini | Freeman | Cravatt |
|---------|---------------------------------------------------------|-------------|--------|---------|--------|---------|--------|---------|---------|---------|-------------|---------|---------|
| Prdx1   | Peroxiredoxin-1                                         | IPI00121788 | 9      | 16      | 0      | 60      | 7      | 67      | 16      | 143     | X           |         |         |
| Hspa8   | Heat shock cognate 71 kDa protein                       | IPI00323357 | 8      | 22      | 6      | 60      | 11     | 57      | 25      | 139     |             |         |         |
| Rps27a  | ribosomal protein S27a                                  | IPI00470152 | 14     | 70      | 0      | 32      | 0      | 33      | 14      | 135     | X           |         |         |
| Hadhb   | Trifunctional enzyme subunit beta, mitochondrial        | IPI00115607 | 0      | 0       | 0      | 72      | 0      | 0       | 0       | 72      | X           | X       |         |
| Ppia    | Peptidyl-prolyl cis-trans isomerase                     | IPI00554989 | 3      | 13      | 0      | 14      | 0      | 12      | 3       | 39      | X           |         |         |
| Hspa9   | heat shock protein 9                                    | IPI00880839 | 4      | 14      | 0      | 4       | 0      | 11      | 4       | 29      |             |         |         |
| Cd14    | Monocyte differentiation antigen CD14**                 | IPI00308990 | 0      | 2       | 0      | 0       | 0      | 25      | 0       | 27      |             |         |         |
| Ugt1a7c | UDP-glucuronosyltransferase 1-7C                        | IPI00417181 | 0      | 0       | 0      | 27      | 0      | 0       | 0       | 27      |             |         |         |
| Actc1   | Actin, alpha cardiac muscle 1                           | IPI00114593 | 0      | 0       | 0      | 19      | 0      | 0       | 0       | 19      |             |         | X       |
| Rps3a   | 40S ribosomal protein S3a                               | IPI00331345 | 0      | 4       | 0      | 0       | 0      | 14      | 0       | 18      | X           | X       |         |
| Gm6654  | similar to ribosomal protein S26                        | IPI00261455 | 0      | 18      | 0      | 0       | 0      | 0       | 0       | 18      |             |         |         |
| Snd1    | Staphylococcal nuclease domain-containing protein 1     | IPI00123129 | 0      | 4       | 0      | 0       | 0      | 12      | 0       | 16      |             |         |         |
| Cd36    | Platelet glycoprotein 4*                                | IPI00331214 | 0      | 0       | 0      | 12      | 0      | 4       | 0       | 16      |             |         |         |
| Ft1l    | ferritin light chain 1                                  | IPI00608020 | 2      | 0       | 0      | 9       | 0      | 7       | 2       | 16      |             |         |         |
| Pdia6   | Protein disulfide-isomerase A6                          | IPI00222496 | 3      | 13      | 0      | 0       | 0      | 2       | 3       | 15      |             |         |         |
| Arhgdia | Rho GDP-dissociation inhibitor 1                        | IPI00322312 | 2      | 2       | 0      | 4       | 0      | 8       | 2       | 14      | X           |         |         |
| Tmx1    | Thioredoxin domain-containing protein 1                 | IPI00121341 | 0      | 0       | 0      | 13      | 0      | 0       | 0       | 13      |             |         |         |
| Hmox1   | Heme oxygenase 1                                        | IPI00131577 | 0      | 0       | 0      | 0       | 0      | 13      | 0       | 13      |             |         |         |
| Gm7218  | ribosomal protein L21 pseudogene                        | IPI00473445 | 0      | 13      | 0      | 0       | 0      | 0       | 0       | 13      |             |         |         |
| Lrrc59  | Leucine-rich repeat-containing protein 59               | IPI00123281 | 0      | 0       | 0      | 4       | 0      | 8       | 0       | 12      |             |         |         |
| Arhgdib | Rho GDP-dissociation inhibitor 2                        | IPI00122568 | 0      | 0       | 0      | 4       | 0      | 8       | 0       | 12      |             |         |         |
| Rplp0   | 60S acidic ribosomal protein P0                         | IPI00314950 | 0      | 0       | 0      | 8       | 0      | 4       | 0       | 12      |             |         |         |
| Lyn     | Isoform LYN B of Tyrosine-protein kinase Lyn*           | IPI00230138 | 0      | 0       | 0      | 9       | 0      | 3       | 0       | 12      | X           |         |         |
| Impdh2  | Inosine-5'-monophosphate dehydrogenase 2                | IPI00323971 | 0      | 0       | 0      | 9       | 0      | 3       | 0       | 12      |             |         | X       |
| Cct3    | T-complex protein 1 subunit gamma                       | IPI00116283 | 0      | 4       | 0      | 4       | 0      | 3       | 0       | 11      |             |         |         |
| Prf1    | Perforin-1                                              | IPI00308993 | 0      | 0       | 0      | 11      | 0      | 0       | 0       | 11      |             |         |         |
| Rpl37   | 60S ribosomal protein L37                               | IPI00453924 | 0      | 8       | 0      | 3       | 0      | 0       | 0       | 11      |             |         |         |
| Rps7    | 40S ribosomal protein S7                                | IPI00136984 | 0      | 8       | 0      | 0       | 0      | 3       | 0       | 11      | X           |         |         |
| Gna13   | Guanine nucleotide-binding protein subunit alpha-13     | IPI00118569 | 0      | 2       | 0      | 5       | 0      | 4       | 0       | 11      | X           | X       |         |
| C1qb    | complement component 1                                  | IPI00132799 | 0      | 0       | 0      | 2       | 0      | 9       | 0       | 11      |             |         |         |
| Rps11   | Ribosomal protein S11                                   | IPI00117569 | 2      | 11      | 0      | 0       | 0      | 0       | 2       | 11      | X           |         |         |
| Rps4x   | 40S ribosomal protein S4, X isoform                     | IPI00331092 | 0      | 2       | 0      | 0       | 0      | 8       | 0       | 10      |             |         |         |
| Eif5a   | Eukaryotic translation initiation factor 5A-1           | IPI00108125 | 0      | 0       | 0      | 4       | 0      | 6       | 0       | 10      |             |         | X       |
| Stxbp5  | Isoform 2 of Syntaxin-binding protein 5                 | IPI00656317 | 0      | 0       | 0      | 4       | 0      | 6       | 0       | 10      | X           |         |         |
| Cct4    | T-complex protein 1 subunit delta                       | IPI00116277 | 0      | 0       | 0      | 6       | 0      | 4       | 0       | 10      |             |         |         |
| -       | M.musculus endogenous provirus env (Fragment)           | IPI00463556 | 0      | 0       | 0      | 10      | 0      | 0       | 0       | 10      |             |         |         |
| Cldd6   | Chronic lymphocytic leukemia deletion region 6 homolog  | IPI00267667 | 0      | 0       | 0      | 4       | 0      | 6       | 0       | 10      |             |         |         |
| Fcgr1g  | High affinity immunoglobulin epsilon receptor gamma     | IPI00119293 | 0      | 10      | 0      | 0       | 0      | 0       | 0       | 10      |             |         |         |
| Cct7    | T-complex protein 1 subunit eta                         | IPI00331174 | 0      | 0       | 0      | 3       | 0      | 7       | 0       | 10      |             |         |         |
| Rps13   | 40S ribosomal protein S13*                              | IPI00125901 | 0      | 0       | 0      | 3       | 0      | 6       | 0       | 9       |             |         |         |
| Ywhae   | 14-3-3 protein epsilon                                  | IPI00118384 | 0      | 0       | 0      | 4       | 0      | 5       | 0       | 9       | X           |         |         |
| Rpl10   | 60S ribosomal protein L10*                              | IPI00474637 | 0      | 6       | 0      | 0       | 0      | 3       | 0       | 9       |             |         | X       |
| Cd68    | Macrosialin                                             | IPI00117031 | 0      | 0       | 0      | 9       | 0      | 0       | 0       | 9       |             |         |         |
| Pl4k2a  | Phosphatidylinositol 4-kinase type 2-alpha              | IPI00121277 | 0      | 0       | 0      | 9       | 0      | 0       | 0       | 9       | X           | X       |         |
| Gdi2    | Isoform 1 of Rab GDP dissociation inhibitor beta        | IPI00122565 | 0      | 2       | 0      | 5       | 0      | 2       | 0       | 9       |             |         |         |
| Gm5908  | hypothetical protein                                    | IPI00474407 | 0      | 4       | 0      | 0       | 0      | 4       | 0       | 8       |             |         |         |
| Rps10   | 40S ribosomal protein S10                               | IPI00112448 | 0      | 0       | 0      | 3       | 0      | 5       | 0       | 8       |             |         |         |
| Gm3414  | hypothetical protein                                    | IPI00652753 | 0      | 0       | 0      | 8       | 0      | 0       | 0       | 8       |             |         |         |
| Gm10079 | ribosomal protein S16 pseudogene                        | IPI00469918 | 0      | 0       | 0      | 0       | 0      | 8       | 0       | 8       |             |         |         |
| Rps25   | 40S ribosomal protein S15                               | IPI00319231 | 0      | 0       | 0      | 0       | 0      | 8       | 0       | 8       |             |         |         |
| Cct8    | T-complex protein 1 subunit theta                       | IPI00469268 | 0      | 0       | 0      | 8       | 0      | 0       | 0       | 8       |             |         |         |
| Ebag9   | Receptor-binding cancer antigen expressed on SiSo cells | IPI00154113 | 0      | 0       | 0      | 4       | 0      | 3       | 0       | 7       | X           |         | X       |
| Msn     | Moesin                                                  | IPI00110588 | 0      | 7       | 0      | 0       | 0      | 0       | 0       | 7       | X           |         |         |
| Cd9     | CD9 antigen                                             | IPI00221921 | 0      | 0       | 0      | 7       | 0      | 0       | 0       | 7       | X           |         |         |
| Cypt5   | cysteine-rich perinuclear theca 5                       | IPI00742265 | 0      | 0       | 0      | 7       | 0      | 0       | 0       | 7       |             |         |         |
| Stx12   | Syntaxin-12                                             | IPI00111416 | 0      | 0       | 0      | 7       | 0      | 0       | 0       | 7       | X           |         | X       |
| Mlec    | Malectin                                                | IPI00312018 | 0      | 0       | 0      | 3       | 0      | 4       | 0       | 7       |             |         |         |
| Milt3   | Protein AF-9                                            | IPI00473183 | 0      | 0       | 0      | 5       | 0      | 2       | 0       | 7       |             |         |         |

|               |                                                        |             |   |   |   |   |   |   |   |   |   |   |   |
|---------------|--------------------------------------------------------|-------------|---|---|---|---|---|---|---|---|---|---|---|
| Vdac1         | Voltage-dependent anion-selective channel protein 1    | IPI00122549 | 0 | 0 | 0 | 0 | 0 | 7 | 0 | 7 | X |   |   |
| Cct2          | T-complex protein 1 subunit beta                       | IPI00320217 | 0 | 0 | 0 | 4 | 0 | 3 | 0 | 7 |   |   | X |
| Mela          | Envelope protein                                       | IPI00406960 | 0 | 0 | 0 | 6 | 0 | 0 | 0 | 6 |   |   |   |
| Znfx1         | NFX1-type zinc finger-containing protein 1             | IPI00660406 | 0 | 0 | 0 | 3 | 0 | 3 | 0 | 6 |   |   |   |
| Vamp3         | Vesicle-associated membrane protein 3                  | IPI00132276 | 0 | 0 | 0 | 6 | 0 | 0 | 0 | 6 |   | X | X |
| -             | Gag-Pol polyprotein*                                   | IPI00108206 | 0 | 0 | 0 | 0 | 0 | 6 | 0 | 6 |   |   |   |
| Tet2          | Isoform 1 of Protein TET2                              | IPI00169923 | 0 | 0 | 0 | 6 | 0 | 0 | 0 | 6 |   |   |   |
| Zeb2          | Zinc finger E-box-binding homeobox 2                   | IPI00420464 | 0 | 0 | 0 | 3 | 0 | 3 | 0 | 6 |   |   |   |
| Cfl1          | Cofilin, non-muscle                                    | IPI00407543 | 0 | 0 | 0 | 3 | 0 | 3 | 0 | 6 |   |   |   |
| Actr3         | Actin-related protein 3                                | IPI00115627 | 0 | 0 | 0 | 6 | 0 | 0 | 0 | 6 |   |   |   |
| Usp32         | ubiquitin specific protease 32                         | IPI00131330 | 0 | 6 | 0 | 0 | 0 | 0 | 0 | 6 |   |   |   |
| Rftn1         | Raftlin*                                               | IPI00469253 | 0 | 0 | 0 | 6 | 0 | 0 | 0 | 6 |   |   | X |
| Rps9          | 40S ribosomal protein S9                               | IPI00420726 | 0 | 3 | 0 | 0 | 0 | 2 | 0 | 5 |   | X | X |
| Abca14        | ATP-binding cassette, sub-family A (ABC1), member 14   | IPI00420146 | 0 | 0 | 0 | 5 | 0 | 0 | 0 | 5 |   |   |   |
| Rpl14         | 60S ribosomal protein L14                              | IPI00133185 | 0 | 5 | 0 | 0 | 0 | 0 | 0 | 5 |   | X |   |
| Bst2          | Bone marrow stromal antigen 2                          | IPI00321222 | 0 | 0 | 0 | 5 | 0 | 0 | 0 | 5 |   |   |   |
| Psm2          | 26S proteasome non-ATPase regulatory subunit 2         | IPI00123494 | 0 | 0 | 0 | 0 | 0 | 5 | 0 | 5 |   |   | X |
| Fam20b        | Protein FAM20B                                         | IPI00122494 | 0 | 0 | 0 | 5 | 0 | 0 | 0 | 5 |   |   |   |
| 4930527J03Rik | Putative uncharacterized protein                       | IPI00675544 | 0 | 2 | 0 | 3 | 0 | 0 | 0 | 5 |   |   |   |
| Fmo9          | flavin containing monooxygenase 9                      | IPI00223948 | 0 | 0 | 0 | 3 | 0 | 2 | 0 | 5 |   |   |   |
| Psm1          | Proteasome subunit alpha type-1                        | IPI00283862 | 0 | 3 | 0 | 0 | 0 | 2 | 0 | 5 |   |   |   |
| Phb2          | Prohibitin-2                                           | IPI00321718 | 0 | 0 | 0 | 3 | 0 | 2 | 0 | 5 |   |   |   |
| Abcc1         | Multidrug resistance-associated protein 1              | IPI00129915 | 0 | 2 | 0 | 3 | 0 | 0 | 0 | 5 |   |   |   |
| Msrb2         | Methionine-R-sulfoxide reductase B2, mitochondrial     | IPI00109655 | 0 | 0 | 0 | 3 | 0 | 2 | 0 | 5 |   |   |   |
| H2afj         | Histone H2A.J                                          | IPI00153400 | 0 | 0 | 0 | 5 | 0 | 0 | 0 | 5 |   |   |   |
| Aplnr         | Apelin receptor                                        | IPI00124989 | 0 | 2 | 0 | 0 | 0 | 3 | 0 | 5 |   |   |   |
| Sod2          | Superoxide dismutase [Mn], mitochondrial               | IPI00109109 | 0 | 0 | 0 | 0 | 0 | 5 | 0 | 5 |   |   |   |
| Stat4         | Signal transducer and activator of transcription 4     | IPI00114970 | 0 | 0 | 0 | 2 | 0 | 3 | 0 | 5 |   |   |   |
| Itga2b        | Integrin alpha-IIb                                     | IPI00315155 | 0 | 3 | 0 | 2 | 0 | 0 | 0 | 5 |   |   |   |
| Tcp1          | Isoform 1 of T-complex protein 1 subunit alpha B       | IPI00459493 | 0 | 0 | 0 | 2 | 0 | 3 | 0 | 5 |   | X | X |
| Vti1b         | Vesicle transport through interaction with t-SNAREs 1B | IPI00130115 | 0 | 2 | 0 | 0 | 0 | 3 | 0 | 5 |   |   |   |
| 8430427H17Rik | Novel protein                                          | IPI00453784 | 0 | 0 | 0 | 5 | 0 | 0 | 0 | 5 |   |   |   |
| Irg1          | Immune-responsive gene 1 protein                       | IPI00111285 | 0 | 0 | 0 | 0 | 0 | 5 | 0 | 5 |   |   |   |
| Nos2          | Nitric oxide synthase, inducible                       | IPI00125726 | 0 | 0 | 0 | 0 | 0 | 5 | 0 | 5 |   |   |   |
| Glud1         | Glutamate dehydrogenase 1, mitochondrial               | IPI00114209 | 0 | 5 | 0 | 0 | 0 | 0 | 0 | 5 |   |   |   |
| Ptbp1         | polypyrimidine tract binding protein 1                 | IPI00136883 | 0 | 0 | 0 | 0 | 0 | 5 | 0 | 5 |   |   | X |
| Hnnpf         | Heterogeneous nuclear ribonucleoprotein F              | IPI00226073 | 0 | 0 | 0 | 2 | 0 | 3 | 0 | 5 |   |   |   |
| Atic          | Bifunctional purine biosynthesis protein PURH          | IPI00330303 | 0 | 0 | 0 | 5 | 0 | 0 | 0 | 5 |   |   |   |
| Emb           | Embigin                                                | IPI00129968 | 0 | 0 | 0 | 5 | 0 | 0 | 0 | 5 |   |   |   |

**Supplementary Table 3. Primers used for cloning and mutagenesis.**

| <b>Description</b> | <b>Primer (5' to 3')</b>                        |
|--------------------|-------------------------------------------------|
| IFITM3 For         | GAATTCCCATGAACCACACTTCTCAAGC                    |
| IFITM3 Rev         | GTCGAC TTAAGTGTGAAGGTTTTGAG                     |
| CD9 For            | AGATCTATGCCGGTCAAAGGAGGTAG                      |
| CD9 Rev            | GAATTC TCACTAGACCATTTCTCGGCTCCTGC               |
| IFITM3 C71A        | ATACACTCTTCATGAACTTCGCATGCCTGGGCTTCATAGCCTATGCC |
| IFITM3 C72A        | ATACACTCTTCATGAACTTCTGCGCACTGGGCTTCATAGCCTATGCC |
| IFITM3 C71, 72A    | ATACACTCTTCATGAACTTCGCAGCACTGGGCTTCATAGCCTATGCC |
| IFITM3 C105A       | CCTACGCCTCCACTGCTAAGGCACTGAACATCAGCACCTTGGTC    |
| hIFITM1 For        | GAATTCCCATGCACAAGGAGGAACATGA                    |
| hIFITM1 Rev        | GTCGACCTAGTAACCCCGTTTTTCCTGTA                   |
| hIFITM2 For        | GAATTCCCATGAACCACATTGTGCAAAC                    |
| hIFITM2 Rev        | GTCGACCTATCGCTGGGCCTGGACGA                      |
| hIFITM3 For        | GAATTCCCATGAATCACACTGTCCAAAC                    |
| hIFITM3 Rev        | GGCC GTCGACCTATCCATAGGCCTGGAAGA                 |

**Supplementary Table 4. Primers used for quantitative PCR reactions**

| <b>Description</b>      | <b>Primer (5' to 3')</b> |
|-------------------------|--------------------------|
| h $\beta$ -actin For    | ACTGGAACGGTGAAGGTGAC     |
| h $\beta$ -actin Rev    | GTGGACTTGGGAGAGGACTG     |
| hRPS11 For              | GCCGAGACTATCTGCACTAC     |
| hRPS11 Rev              | ATGTCCAGCCTCAGAACTTC     |
| h $\alpha$ -tubulin For | GCCTGGACCACAAGTTTGAC     |
| h $\alpha$ -tubulin Rev | TGAAATTCTGGGAGCATGAC     |
| m $\beta$ -actin For    | AGGTGACAGCATTGCTTCTG     |
| m $\beta$ -actin Rev    | GCTGCCTCAACACCTCAAC      |
| mRPS11 For              | CGTGACGAAGATGAAGATGC     |
| mRPS11 Rev              | GCACATTGAATCGCACAGTC     |
| m $\alpha$ -tubulin For | TGCCTTTGTGCACTGGTATG     |
| m $\alpha$ -tubulin Rev | CTGGAGCAGTTTGACGACAC     |
| mIFITM3 For             | AACATGCCAGAGAGGTGTC      |
| mIFITM3 Rev             | ACCATCTCCGATCCCTAGAC     |
| Influenza NP For        | CAGCCTAATCAGACCAAATG     |
| Influenza NP Rev        | TACCTGCTTCTCAGTTCAAG     |

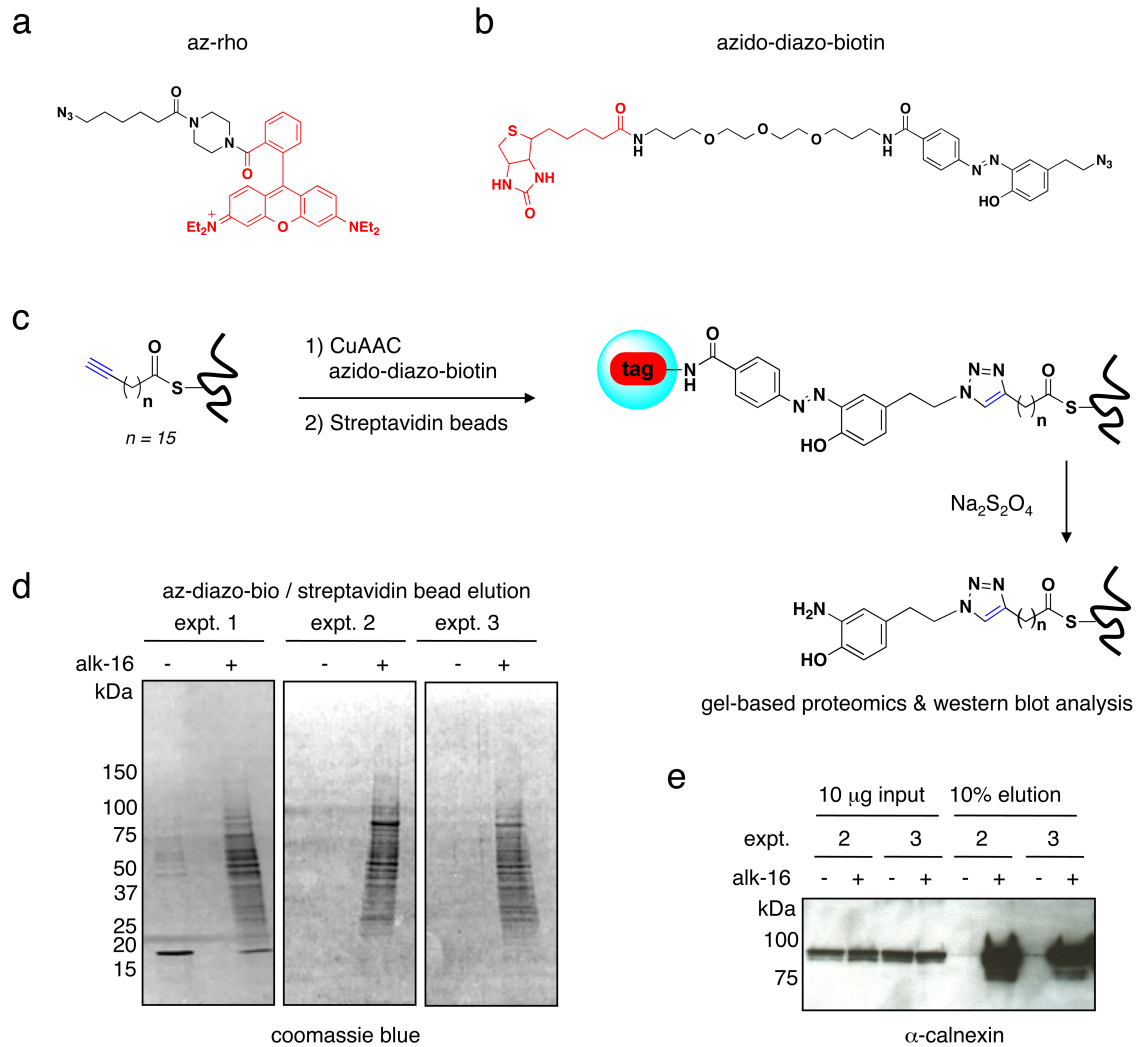

**Supplementary Fig. 1. Identification of alk-16 labeled proteins.** (A) Structure of az-rho. (B) Structure of azido-diazo-biotin. (C) Selective enrichment of alk-16 labeled proteins. (D and E) DC2.4 cells were incubated for 2 h with 50  $\mu$ M alk-16 or DMSO as a control. Cell lysates were reacted with az-diazo-biotin by CuAAC for enrichment of alk-16 labeled proteins with streptavidin beads. (D) Proteins eluted from beads using sodium dithionite were separated by SDS-PAGE and visualized by coomassie blue staining. (E) 10  $\mu$ g of lysate from alk-16 labeled DC2.4 cells and 10% of selectively enriched alk-16 labeled proteins were separated by SDS-PAGE and blotted for calnexin to confirm the selective retrieval of palmitoylated proteins.

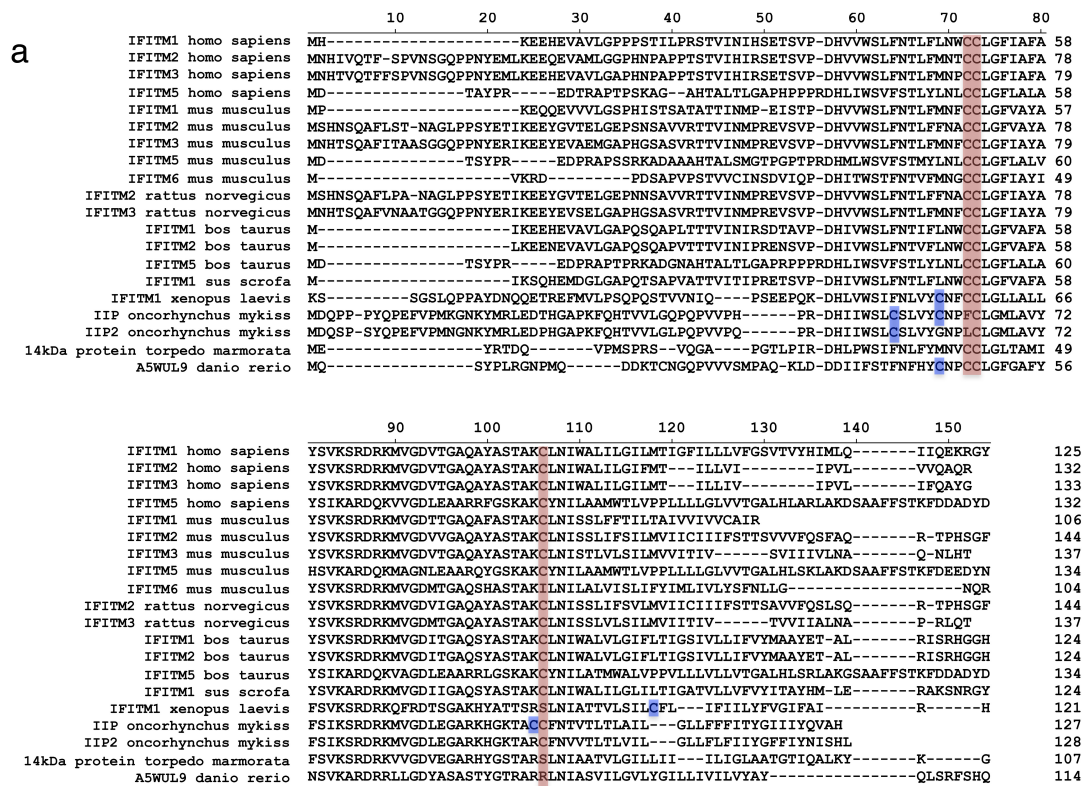

**Supplementary Fig. 2. Evolutionary conservation of palmitoylated cysteine residues among IFITM family isoforms.** (A) IFITM family members from various species were aligned using the Clustal V method. Amino acids corresponding to palmitoylated cysteine residues of mouse IFITM3 are shaded red. Additional membrane-proximal cysteines present in other IFITM isoforms but not in IFITM3 are shaded blue. (B) HeLa cells grown in 6-well plates were transfected overnight with 2  $\mu$ g empty vector or vector encoding the indicated human IFITM isoforms and labeled with 50  $\mu$ M alk-16 for 2 h. Cell lysates were subjected to anti-HA immunoprecipitation, reacted with az-rho by CuAAC, separated by SDS-PAGE and visualized by fluorescence gel scanning. Comparable protein loading was confirmed by anti-HA western blotting.



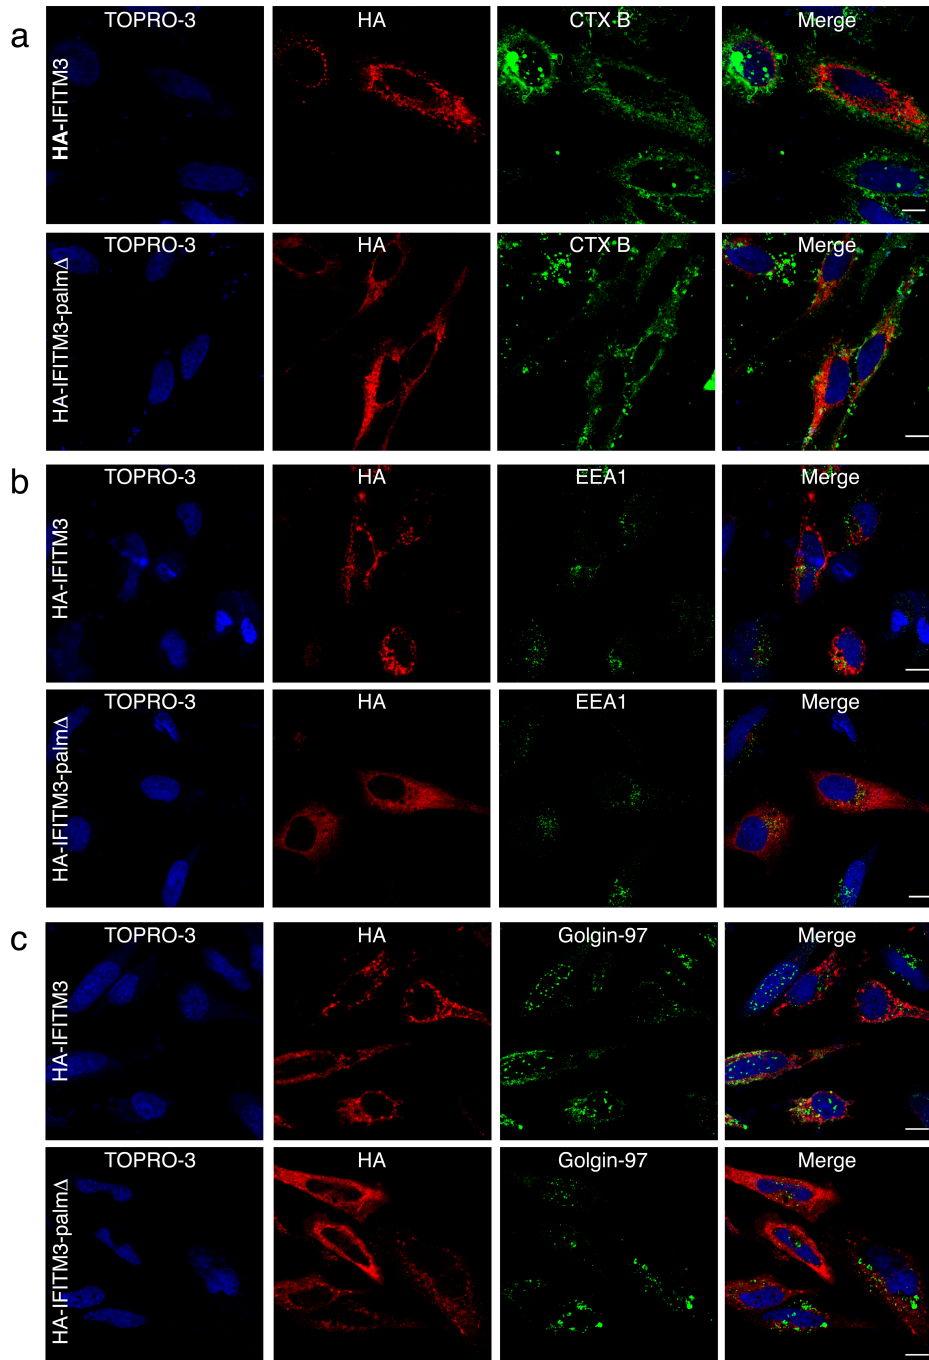

**Supplementary Fig. 3. Costaining of IFITM3 and IFITM3-palmΔ with cellular markers.** HeLa cells were transfected with pCMV-HA-IFITM3 and pCMV-HA-IFITM3-palmΔ and stained with anti-HA (red) and TOPRO-3 (blue). Cells were also treated with FITC-conjugated cholera toxin B (CTX B) (green) or stained with antibodies against EEA1 or golgin-97 (green). Scale bars represent 10 μm.

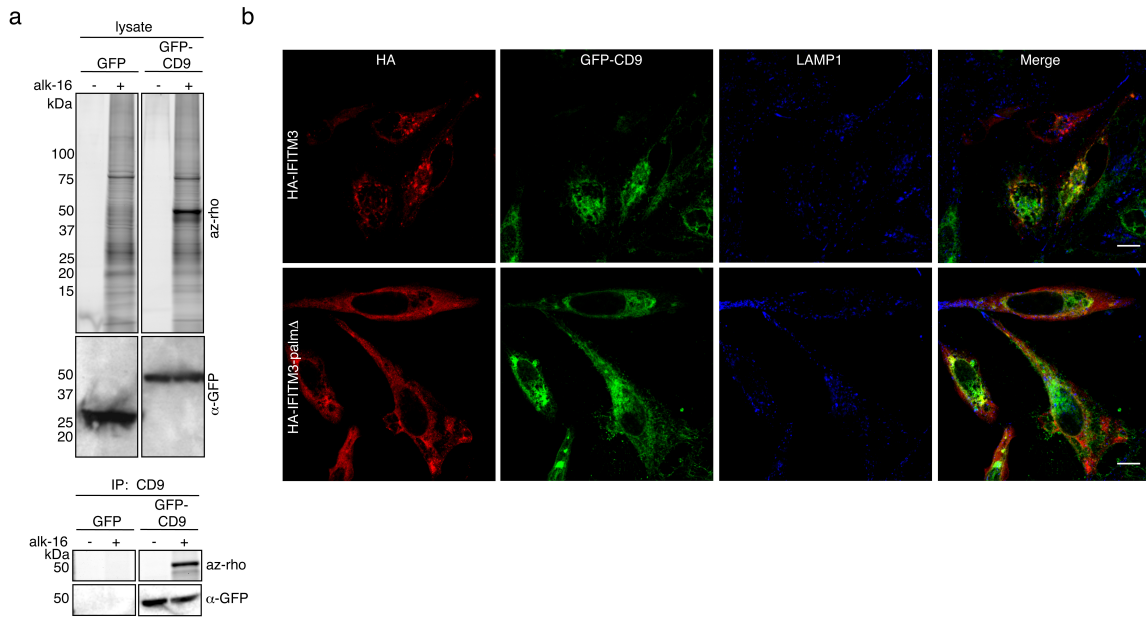

**Supplementary Fig. 4. Palmitoylation of GFP-CD9.** (A) HeLa cells were transfected with pEGFP-C1 or pEGFP-C1-CD9 and labeled with 50  $\mu$ M alk-16 for 2 h. Cell lysates were reacted with az-rho by CuAAC followed by SDS-PAGE and visualization by fluorescence gel scanning. Anti-CD9 immunoprecipitation, reaction with az-rho by CuAAC, and SDS-PAGE allowed visualization by fluorescence gel scanning. Equal protein loading was confirmed by anti-GFP western blotting. (B) HeLa cells were transfected with pCMV-HA-IFITM3 or pCMV-HA-IFITM3-palm $\Delta$  and pEGFP-C1-CD9. Cells were stained with anti-HA (red) and anti-LAMP1 (blue), and GFP was visualized (green). Scale bars represent 10  $\mu$ m.

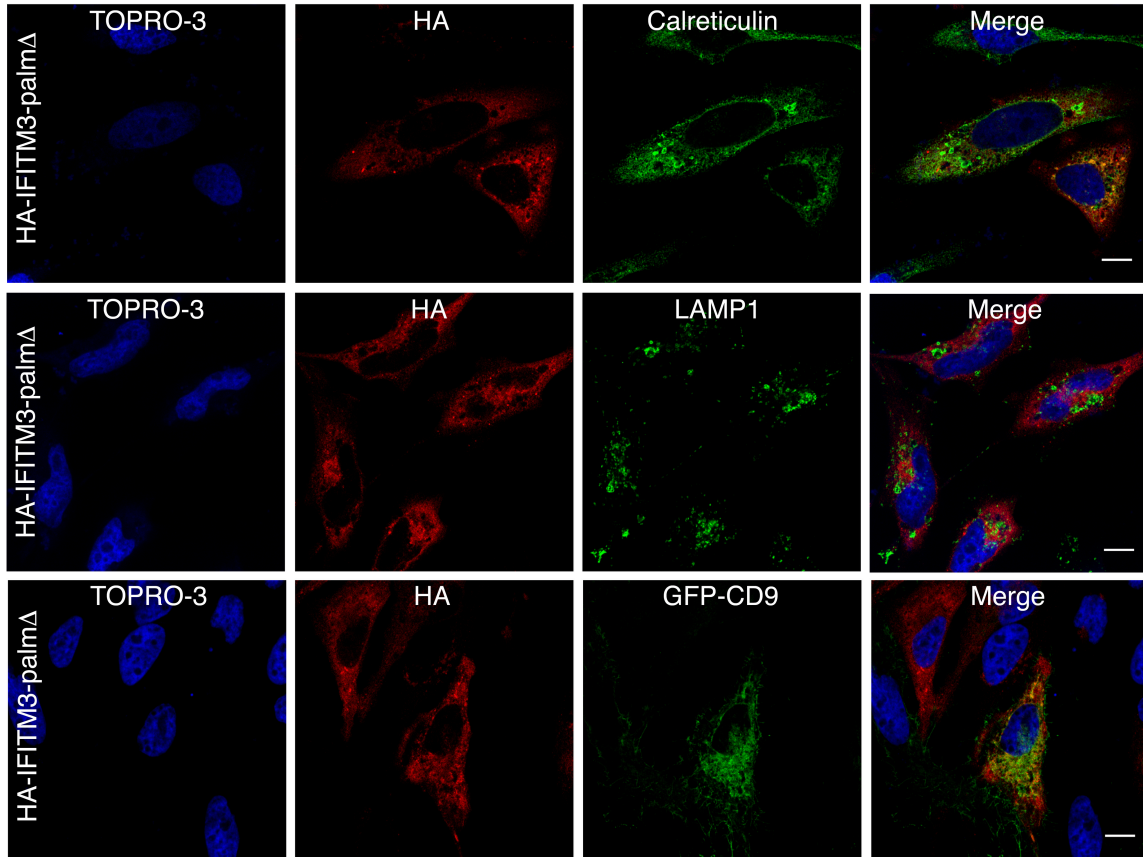

**Supplementary Fig. 5. Costaining of IFITM3-Palm $\Delta$  with cellular markers.** HeLa cells were transfected with pCMV-HA-IFITM3-palm $\Delta$  and stained with anti-HA (red) and TOPRO-3 (blue). Cells were also stained with antibodies against cellular markers, calreticulin and LAMP1 (green), or cotransfected with GFP-CD9 (green). Scale bars represent 10  $\mu$ m.

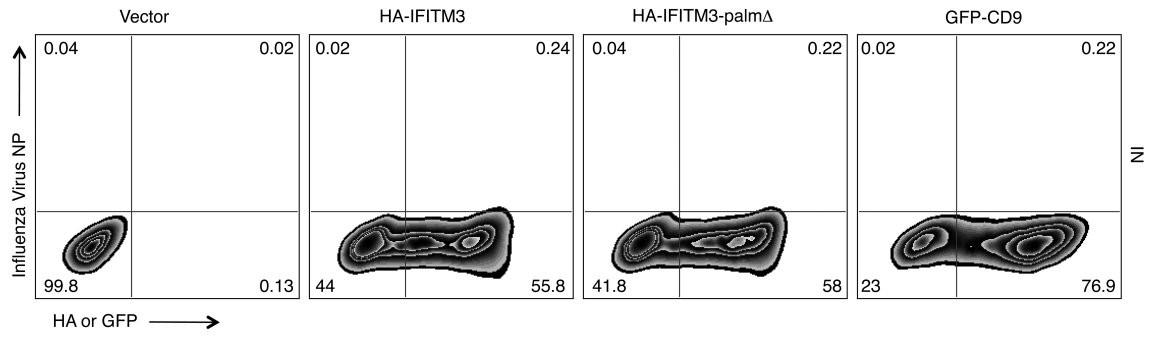

**Supplementary Fig. 6. Non-infected (NI) controls corresponding to Fig. 4b.**

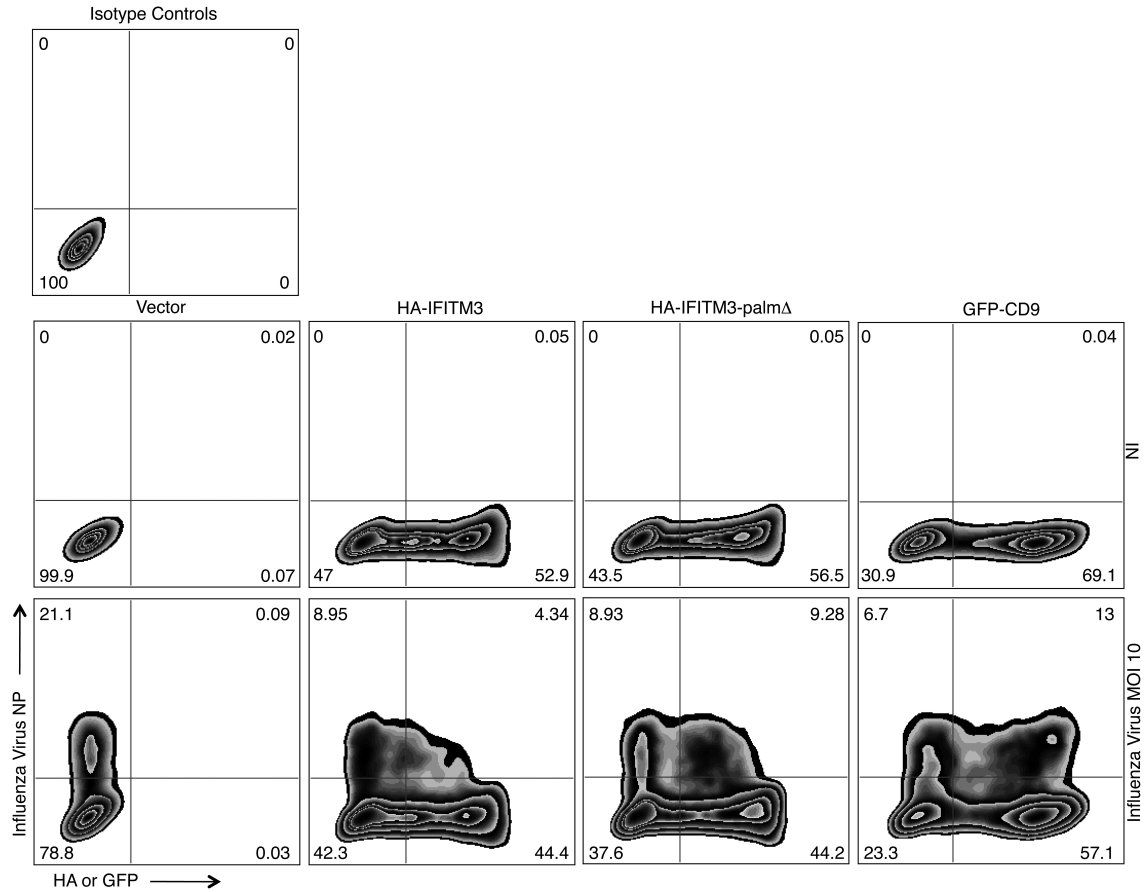

**Supplementary Fig. 7. Anti-viral activity of IFITM3 is dependent on palmitoylation.** HeLa cells were transfected with pCMV-HA, pCMV-HA-IFITM3, pCMV-HA-IFITM3-palm $\Delta$ , or pEGFP-C1-CD9 and infected with influenza virus at an MOI of 10 for 6 h. Virus NP and IFITM3 protein levels were examined by flow cytometry using anti-NP and anti-HA staining respectively. NI; non-infected. Note: the HA-tag epitope is derived from an H3 influenza virus and is not present in the PR8 strain of H1N1 influenza virus.

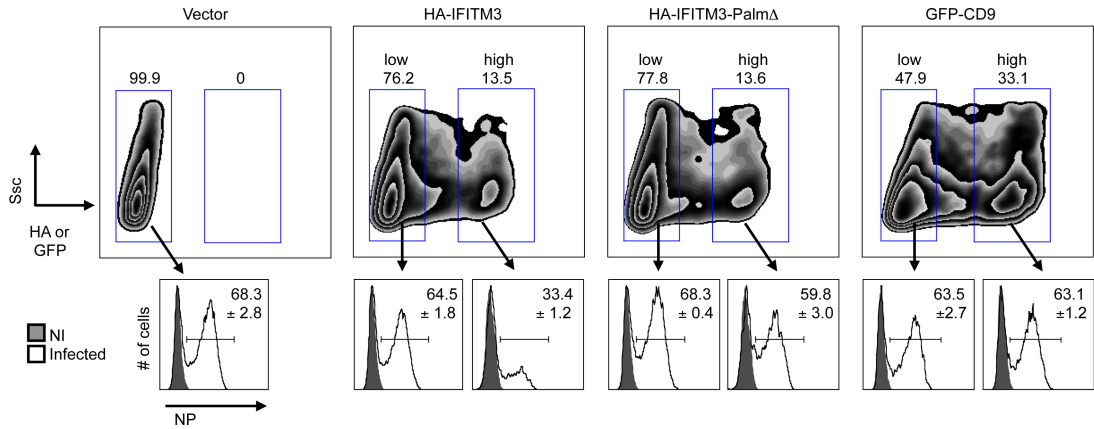

**Supplementary Fig. 8. Palmitoylation-dependent anti-viral activity of IFITM3.** Cells grown in 12-well plates were transfected with 1 ug pCMV-HA, pCMV-HA-IFITM3, pCMV-HA-IFITM3-palm $\Delta$ , or pEGFP-C1-CD9 and infected with influenza virus at an MOI of 1 for 6 h. Non-transfected and transfected cells expressing the proteins of interest were gated on (labeled low and high respectively) and analyzed for the percentage of these cells that were infected. Histograms show the percentage of cells staining positive for influenza NP antigen. Gates were set by comparing to non-infected cells transfected with the same plasmids. Error represents standard deviation, n=4.

### Supplementary References

1. Kang, R. et al. Neural palmitoyl-proteomics reveals dynamic synaptic palmitoylation. *Nature* **456**, 904-9 (2008).
2. Yang, W., Di Vizio, D., Kirchner, M., Steen, H. & Freeman, M.R. Proteome-scale characterization of human s-acylated proteins in lipid raft-enriched and non-raft membranes. *Mol Cell Proteomics* (2009).
3. Martin, B.R. & Cravatt, B.F. Large-scale profiling of protein palmitoylation in mammalian cells. *Nat Methods* **6**, 135-8 (2009).
